# Supplementary material for: Kainic acid Induces production and aggregation of amyloid β-protein and memory deficits by activating inflammasomes in NLRP3- and NF-κB-stimulated pathways
Source: PubMed Central journal article supplement (PMC6594814; doi:10.18632/aging.102017), 2019-06-10
Supplement: aging-11-102017-s001.pdf [file aging-11-102017-s001.pdf]

**SUPPLEMENTARY FIGURE**

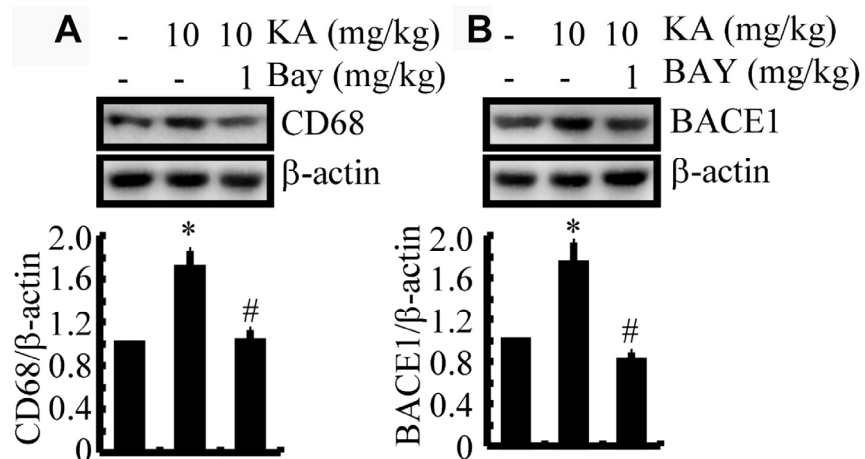

**Supplementary Figure 1. Bay11-7082 attenuates KA-induced the expression of CD68 and BACE1.** (A) The expression of CD68 in the brains of KA (10 mg/kg)- and/or Bay11-7082 (1 mg/kg)+KA-treated APP23 mice. (B) The expression of BACE1 in the brains of KA (10 mg/kg)- and/or Bay11-7082 (1 mg/kg)+KA-treated APP23 mice. The optical density of bands in western blots was analyzed by image J software (\*  $P < 0.05$  vs. controls; #  $P < 0.05$  vs. the KA group; the significant difference from the respective values were determined by one-way analysis of variance test, N=6).
